# Supplementary material for: The Influence of the Debunker’s Identity and Emotional Expression on the Sharing Behavior of Debunking Information
Source: Front Psychol. 2021 Dec 6;12:783415. doi: 10.3389/fpsyg.2021.783415 (PMC8685251; doi:10.3389/fpsyg.2021.783415)
Supplement: Supplementary file 1 [file Data_Sheet_1.XLSX]

## Sheet: Sheet1
Sample1
y	ac1	ac2	ac3	s1	s2	delay	ac	fol	tag	url	pic	vid
45	1	0	0	0	0	1.66102	1	329077	0	0	1	0
565	1	0	0	1	0	1.66303	1	703902	1	0	1	0
5	1	0	0	1	0	1.70691	1	795122	0	0	1	0
0	0	0	0	0	0	1.78359	0	60	0	0	0	0
1240	0	1	0	0	0	1.83707	1	19076477	1	1	0	1
89	0	1	0	0	0	1.86361	1	1468528	0	0	1	0
38	0	1	0	0	0	1.88833	1	1690522	1	0	0	1
0	0	0	0	0	0	1.98095	0	565	1	0	1	0
0	1	0	0	0	0	2.02611	1	186481	0	0	1	0
168	1	0	0	1	0	2.02869	1	329077	1	0	1	0
16	1	0	0	1	0	2.0645	1	1265601	1	0	0	0
0	0	0	0	0	0	2.41293	0	1062	0	1	1	0
173	0	1	0	0	0	2.41851	1	103405945	1	0	1	0
0	0	1	0	0	0	2.42008	1	253767	1	0	1	0
98	0	1	0	0	0	2.42809	1	17502874	1	1	1	0
0	0	1	0	0	0	2.42953	1	108358	1	0	1	0
6	0	0	1	0	0	2.43391	1	30398	1	1	0	1
2	0	1	0	0	0	2.46985	1	3950068	1	0	1	0
0	0	0	0	0	0	2.4816	0	462	0	1	0	0
2	0	0	0	0	0	2.49519	0	14496	1	0	1	0
0	0	0	0	0	0	2.51016	0	3387	1	1	1	0
0	1	0	0	0	0	2.52183	1	505701	1	0	1	0
20	0	1	0	0	0	2.57116	1	207745	1	0	0	1
0	0	0	1	1	0	2.572	1	16386	1	0	1	0
0	0	0	0	1	0	2.57649	0	151	1	0	0	0
0	0	1	0	0	0	2.57672	1	2688558	1	1	0	1
0	1	0	0	0	0	2.57685	1	196649	1	0	0	1
0	1	0	0	0	0	2.57744	1	396418	1	0	0	0
0	0	0	0	0	0	2.57966	0	86	1	0	0	0
1	0	0	0	1	0	2.58071	0	210	1	0	0	0
1	0	1	0	0	0	2.58082	1	7669806	1	0	0	1
1	0	0	0	1	0	2.58124	0	171	1	0	1	0
0	0	0	1	0	0	2.58125	1	6963	1	1	0	1
43	1	0	0	0	1	2.58249	1	1379427	1	0	0	0
0	0	0	0	1	0	2.58419	0	113	1	0	0	0
0	0	1	0	0	0	2.58505	1	4028227	1	0	1	0
0	1	0	0	0	0	2.5856	1	437343	1	1	0	1
1	0	0	0	0	0	2.58573	0	128	1	0	0	0
0	0	0	0	1	0	2.58742	0	224	1	0	0	0
0	0	0	0	0	0	2.58891	0	114	1	0	0	0
0	1	0	0	1	0	2.58909	1	101619	1	0	0	0
7	1	0	0	0	0	2.58957	1	2910	1	0	1	0
0	0	1	0	0	0	2.58962	1	770749	1	1	0	1
0	0	1	0	0	0	2.59086	1	395827	1	1	0	1
0	0	1	0	0	0	2.59142	1	2076276	1	0	0	1
0	1	0	0	0	0	2.59174	1	190251	1	0	0	1
0	0	0	0	1	0	2.59185	0	177	1	0	0	0
0	0	0	0	1	0	2.59196	0	355	0	0	0	0
6	0	0	1	1	0	2.59238	1	61192	1	0	1	0
2	0	0	0	1	0	2.59272	0	1331	1	0	0	0
0	0	0	0	0	0	2.59315	0	482	1	0	0	0
0	1	0	0	0	0	2.59369	1	823	1	0	0	0
3	0	0	0	0	0	2.59405	0	718	1	0	0	0
2	0	0	0	1	0	2.59447	0	255	1	0	0	0
1	0	0	0	1	0	2.59485	0	117503	1	0	0	0
0	1	0	0	0	0	2.59505	1	48678	1	0	0	0
0	0	0	0	1	0	2.59593	0	31	1	0	0	0
0	0	0	0	1	0	2.59655	0	5509	1	0	0	0
0	1	0	0	0	0	2.59694	1	180	1	0	0	0
0	1	0	0	1	0	2.59748	1	1855186	1	0	0	0
0	0	0	0	1	0	2.5986	0	274	1	0	0	0
1	0	0	0	1	0	2.59863	0	79	1	0	0	0
0	1	0	0	1	0	2.59884	1	128	1	0	0	0
0	1	0	0	0	0	2.5991	1	1477122	1	0	0	1
0	0	0	0	1	0	2.59924	0	316	1	0	0	0
0	0	0	0	1	0	2.60013	0	132	1	0	0	0
0	0	0	0	1	0	2.60036	0	118	1	0	0	0
0	0	0	0	0	0	2.60045	0	255	1	0	0	0
6	0	1	0	0	0	2.60047	1	22792521	1	0	0	1
0	0	0	0	1	0	2.60134	0	95	1	0	0	0
0	0	0	0	1	0	2.60238	0	334	1	0	0	0
1	0	0	0	1	0	2.60259	0	36	1	0	0	0
0	0	0	0	1	0	2.60262	0	68	1	0	0	0
0	0	0	1	0	0	2.60413	1	1050417	1	0	0	1
0	0	0	0	0	0	2.60454	0	155	1	0	0	0
0	0	0	0	0	0	2.6047	0	1145	1	0	0	0
6	0	0	0	1	0	2.60475	0	268	1	0	0	0
0	1	0	0	0	0	2.60542	1	156980	1	1	0	1
0	1	0	0	0	0	2.60563	1	10610	1	0	0	0
0	0	0	0	0	0	2.60564	0	1472	1	0	0	0
0	0	0	0	0	0	2.60674	0	224	1	0	0	0
3	1	0	0	0	0	2.60684	1	1855186	1	0	1	0
0	0	0	0	0	0	2.60728	0	373	1	0	0	0
0	0	0	0	1	0	2.6076	0	75	1	0	0	0
1	0	1	0	0	0	2.60884	1	6371990	1	0	0	1
0	0	1	0	0	0	2.60884	1	20772190	1	0	0	1
1	0	1	0	0	0	2.60884	1	43374707	1	0	0	1
0	1	0	0	0	0	2.60885	1	4126917	1	0	0	1
0	1	0	0	0	0	2.60885	1	2572290	1	0	0	1
0	1	0	0	0	0	2.60985	1	75157	1	0	0	0
0	0	0	0	1	0	2.61008	0	108	1	0	0	0
0	0	0	0	0	0	2.61087	0	310	1	0	0	0
0	1	0	0	1	0	2.61088	1	12949	1	1	0	1
0	1	0	0	1	0	2.61116	1	415	1	0	0	0
0	0	0	0	0	0	2.61132	0	16	1	0	0	0
1	0	0	0	0	0	2.61485	0	29	1	0	0	0
0	0	0	0	0	0	2.61514	0	69	1	0	0	0
0	0	0	0	1	0	2.61593	0	26	1	0	1	0
0	0	0	0	0	0	2.61631	0	1241	1	0	0	0
0	1	0	0	1	0	2.61648	1	271	1	0	0	0
0	0	0	0	0	0	2.61694	0	204	1	0	0	0
0	0	1	0	0	0	2.61792	1	2422469	1	0	0	1
0	0	1	0	0	0	2.61829	1	572938	1	0	0	1
0	0	0	0	0	0	2.61834	0	131	1	0	0	0
0	1	0	0	1	0	2.61958	1	1588	1	0	0	0
0	0	0	0	0	0	2.61961	0	11186	1	1	0	1
0	0	0	0	1	0	2.61963	0	385	1	0	0	0
0	0	0	0	0	0	2.61966	0	132	1	0	0	0
0	0	0	0	0	0	2.62021	0	1114	1	0	0	0
0	1	0	0	0	0	2.62036	1	1053572	1	0	1	0
0	0	0	0	0	0	2.62061	0	145	1	0	1	0
0	0	0	0	0	0	2.62097	0	196	1	0	0	0
0	0	0	0	1	0	2.62101	0	94	1	0	0	0
0	0	0	0	1	0	2.62111	0	64	1	0	0	0
0	0	0	0	0	0	2.62124	0	91	1	0	0	0
0	1	0	0	0	0	2.62126	1	2492555	1	1	0	1
0	0	0	1	0	0	2.62169	1	47131	1	0	0	1
0	1	0	0	0	0	2.6217	1	547596	1	1	0	1
0	0	0	0	0	1	2.62223	0	110	1	0	0	0
1	0	0	0	0	1	2.62252	0	88	1	0	0	0
0	0	0	0	0	0	2.62256	0	236	1	0	0	0
0	1	0	0	0	0	2.62296	1	133	1	0	0	0
0	0	0	0	0	0	2.62301	0	278	1	0	0	0
0	1	0	0	0	1	2.62377	1	419332	1	0	1	0
1	1	0	0	1	0	2.62399	1	565333	1	0	0	0
0	0	0	0	1	0	2.624	0	239	1	0	1	0
18	1	0	0	1	0	2.62426	1	7340	1	0	0	0
0	0	0	0	0	0	2.62439	0	311	1	0	0	0
0	0	0	0	0	0	2.6244	0	74	1	0	0	0
0	1	0	0	1	0	2.6251	1	35824	1	0	0	0
0	0	1	0	0	0	2.62516	1	744294	1	1	0	1
0	0	0	0	0	0	2.62531	0	29	1	0	0	0
0	0	0	0	0	0	2.62537	0	28	1	0	0	0
0	0	0	0	1	0	2.62544	0	2	1	0	0	0
0	0	0	0	0	0	2.62569	0	75	1	0	0	0
0	0	0	0	1	0	2.62574	0	164	1	0	0	0
0	1	0	0	1	0	2.62594	1	19083	1	0	0	0
0	0	0	0	0	0	2.62628	0	59	1	0	0	0
0	0	0	0	0	0	2.62648	0	290	1	0	0	0
5	1	0	0	0	0	2.62657	1	1855290	1	0	0	0
1	1	0	0	0	0	2.62675	1	72	1	0	0	0
0	0	1	0	0	0	2.62684	1	2598710	1	0	0	1
2	0	0	0	1	0	2.62725	0	44	1	0	0	0
0	1	0	0	0	0	2.62731	1	592164	1	0	0	1
0	0	0	0	1	0	2.62808	0	96	1	0	0	0
0	1	0	0	0	0	2.62933	1	943712	1	0	1	0
0	0	0	0	1	0	2.62947	0	519	1	0	0	0
8	1	0	0	0	0	2.62995	1	307658	1	0	1	0
1	0	0	0	0	0	2.63	0	60	1	0	0	0
0	0	0	0	0	0	2.63007	0	291	1	0	0	0
0	0	1	0	0	0	2.63152	1	242238	1	1	0	1
15	1	0	0	0	0	2.63273	1	8285286	1	0	1	0
1	0	0	0	1	0	2.63313	0	43	1	0	0	0
1	1	0	0	0	0	2.63389	1	1158	1	0	0	0
0	0	0	0	0	0	2.6341	0	388	1	0	0	0
0	0	0	0	1	0	2.63419	0	33	1	0	0	0
0	0	1	0	0	0	2.63517	1	2879798	1	0	0	1
158	1	0	0	1	0	2.63529	1	144337	1	0	1	0
4	1	0	0	1	0	2.63547	1	137	1	0	0	0
0	0	0	0	1	0	2.63582	0	164	1	0	0	0
0	0	0	0	0	0	2.63619	0	82	1	0	0	0
0	0	0	0	1	0	2.63703	0	898	1	0	0	0
3	0	0	0	0	1	2.63742	0	1838	1	0	0	0
0	0	0	0	1	0	2.63765	0	79	1	0	1	0
0	1	0	0	1	0	2.63774	1	103259	1	0	0	0
0	0	0	0	1	0	2.63808	0	12146	1	0	0	0
0	1	0	0	0	0	2.63859	1	10610	1	0	0	0
0	0	0	0	1	0	2.63873	0	253	1	0	0	0
0	0	0	0	0	0	2.63885	0	681	1	0	0	0
3	0	0	0	0	0	2.6389	0	242	1	0	0	0
0	0	0	0	0	0	2.63932	0	99	1	0	0	0
0	1	0	0	0	0	2.63973	1	1332975	1	1	0	1
0	0	0	0	0	0	2.64102	0	697	1	0	0	0
0	0	0	0	1	0	2.64128	0	158	1	0	0	0
10	1	0	0	1	0	2.64154	1	1051323	1	0	0	1
0	0	0	0	1	0	2.6419	0	79	1	0	0	0
2	1	0	0	1	0	2.642	1	65331	1	0	0	0
7	0	0	0	0	0	2.64241	0	112	1	0	0	0
0	0	0	0	1	0	2.64307	0	721	1	0	0	0
0	0	0	0	0	0	2.64309	0	32	1	0	0	0
0	0	0	0	0	0	2.64337	0	66	1	0	0	0
0	0	0	0	0	0	2.64358	0	215	1	0	1	0
0	1	0	0	0	0	2.6437	1	8984	1	0	0	0
2	0	0	0	1	0	2.64397	0	192	1	0	0	0
0	0	0	0	0	0	2.64439	0	156	1	0	0	0
0	0	0	0	1	0	2.64443	0	108	1	0	0	0
0	0	0	0	0	0	2.64478	0	95	1	0	0	0
8	1	0	0	0	0	2.64486	1	65331	1	0	1	0
0	0	0	0	0	0	2.6458	0	42	1	0	0	0
0	0	0	0	1	0	2.64606	0	131	1	0	0	0
0	0	0	0	1	0	2.64641	0	297	1	0	0	0
0	0	1	0	0	0	2.64697	1	280319	1	0	0	1
0	1	0	0	0	0	2.64806	1	112	1	0	0	0
1	0	0	0	1	0	2.64826	0	92	1	0	0	0
0	0	0	1	0	0	2.64837	1	148688	1	0	0	1
5	0	0	0	0	0	2.64841	0	159	1	0	1	0
0	1	0	0	0	0	2.64859	1	2022350	1	0	1	0
0	0	0	0	0	0	2.64885	0	1054	1	1	0	0
3	0	0	0	1	0	2.64917	0	535	1	0	1	0
1	1	0	0	1	0	2.64936	1	12044	1	0	0	0
0	0	0	0	1	0	2.65081	0	44	1	0	0	0
0	1	0	0	0	0	2.65115	1	128682	1	0	0	1
0	0	0	0	0	0	2.65141	0	447	1	0	0	0
0	0	0	0	0	0	2.65208	0	91	1	0	0	0
0	0	1	0	0	0	2.65281	1	22089	1	0	0	1
0	0	0	0	1	0	2.65281	0	204	1	0	0	0
0	0	0	0	0	0	2.65286	0	98	1	0	0	0
0	0	1	0	0	0	2.65376	1	105066	1	0	0	1
0	0	0	0	1	0	2.65501	0	155	1	0	0	0
0	0	0	0	0	0	2.65583	0	231	1	0	0	0
0	0	1	0	0	0	2.65601	1	7237887	1	0	0	1
0	0	0	0	1	0	2.66105	0	212	1	0	0	0
0	1	0	0	0	0	2.66141	1	1503	1	0	0	0
0	0	0	0	0	0	2.66145	0	2821	1	0	0	0
0	0	0	0	1	0	2.66152	0	96	1	0	0	0
0	0	0	0	0	0	2.66236	0	8	1	0	0	0
0	0	0	0	1	0	2.66416	0	68	1	0	0	0
1	0	0	0	0	0	2.66785	0	161	1	0	0	0
0	0	0	0	0	0	2.66829	0	166	1	0	0	0
0	0	0	0	1	0	2.6683	0	107	1	0	0	0
0	0	0	0	0	0	2.66988	0	382	1	0	0	0
0	1	0	0	1	0	2.67039	1	213	1	0	0	0
27	1	0	0	1	0	2.67065	1	602745	1	0	0	0
0	0	1	0	0	0	2.67208	1	7061584	1	0	0	1
1	0	1	0	0	0	2.67238	1	2247320	1	0	1	0
0	0	0	0	0	0	2.67266	0	26	1	0	0	0
27	1	0	0	0	0	2.67563	1	1071286	1	0	1	0
0	0	0	0	1	0	2.67623	0	531	1	0	0	0
0	0	1	0	0	0	2.6776	1	734339	1	1	0	1
0	0	0	0	0	0	2.67922	0	366	0	0	0	0
0	0	0	0	1	0	2.67973	0	160	1	0	0	0
1	0	1	0	0	0	2.68088	1	2397064	1	0	0	1
0	0	0	0	0	0	2.68256	0	38	1	0	0	0
0	1	0	0	0	0	2.68263	1	188731	1	1	1	0
0	0	0	0	1	0	2.68275	0	239	1	0	0	0
0	0	0	0	1	0	2.68422	0	135	1	0	0	0
0	0	0	0	0	0	2.68491	0	19678	1	0	0	0
0	0	0	0	0	0	2.6852	0	123	1	0	0	0
0	0	0	0	0	0	2.68532	0	36	1	0	0	0
1	1	0	0	1	0	2.68564	1	902866	1	0	0	0
0	0	1	0	0	0	2.68726	1	6860133	1	0	0	1
0	0	0	0	1	0	2.69108	0	140	1	0	0	0
3	0	0	0	0	0	2.69403	0	6660	1	1	1	0
0	1	0	0	0	0	2.70126	1	300846	1	0	0	1
0	0	1	0	0	0	2.70132	1	59015	1	0	0	1
0	0	0	0	0	0	2.70444	0	71	1	0	0	0
1	0	1	0	0	0	2.70508	1	10762531	1	0	0	0
0	0	0	0	0	0	2.70512	0	162	1	0	0	0
1	0	1	0	0	0	2.70809	1	1141601	1	1	0	1
0	0	0	1	0	0	2.70913	1	3934	1	0	0	1
0	1	0	0	0	0	2.70926	1	66146	1	0	0	1
0	0	0	0	0	0	2.70941	0	240	1	0	0	0
0	0	0	0	1	0	2.711	0	85	1	0	0	0
0	1	0	0	0	0	2.71476	1	150463	1	1	0	1
0	0	0	0	0	0	2.7151	0	79	1	0	0	0
0	0	0	0	1	0	2.71825	0	168	1	0	0	0
0	0	0	0	1	0	2.71836	0	473	1	0	0	0
0	0	0	0	1	0	2.71914	0	2022	1	0	1	0
0	1	0	0	0	0	2.72313	1	298	1	0	0	0
0	0	0	0	1	0	2.72417	0	88	1	0	0	0
0	0	0	0	0	0	2.72742	0	20	1	0	0	0
0	1	0	0	0	0	2.73043	1	1099	0	1	0	0
0	1	0	0	0	1	2.73064	1	152	1	0	0	0
0	0	0	0	1	0	2.73075	0	98	1	0	0	0
0	0	0	0	1	0	2.73124	0	353	1	0	0	0
21	0	1	0	0	1	2.73397	1	46891	0	0	1	0
0	0	0	0	1	0	2.73419	0	584	1	0	0	0
0	0	1	0	0	0	2.74257	1	11855	1	0	0	1
0	1	0	0	0	0	2.74465	1	328903	1	0	0	1
0	0	0	0	0	0	2.747	0	97	1	0	0	0
0	0	1	0	0	0	2.75148	1	29203	1	0	0	1
0	1	0	0	1	0	2.7535	1	1401	1	0	0	0
0	1	0	0	1	0	2.7617	1	205	1	0	0	0
0	0	0	1	0	0	2.76564	1	9057	1	1	0	0
0	0	0	0	0	0	2.7685	0	180	1	0	0	0
0	0	0	0	1	0	2.76859	0	98	1	0	0	0
0	0	0	0	0	0	2.77056	0	1237	1	0	0	0
0	1	0	0	1	0	2.77464	1	45	1	0	0	0
0	0	0	0	1	0	2.78019	0	266	1	0	0	0
1	0	1	0	0	0	2.79631	1	7274537	1	1	1	0
0	0	0	0	1	0	2.80082	0	3156	1	0	0	0
0	1	0	0	0	0	2.80516	1	44796	0	1	0	0
0	1	0	0	0	0	2.80584	1	44796	0	1	0	0
0	0	1	0	0	0	2.8192	1	2179803	1	0	0	1
0	1	0	0	0	0	2.82856	1	363315	1	0	0	1
7	1	0	0	1	0	2.83785	1	703949	1	0	0	0
0	0	0	0	0	0	2.86581	0	1150	0	1	0	0
0	1	0	0	0	0	2.88821	1	575210	1	1	0	1
0	0	0	1	1	0	2.9008	1	664	0	1	0	0
0	0	0	1	0	0	2.91644	1	135192	1	0	0	1
0	0	1	0	0	0	2.91778	1	2347551	0	1	0	0
0	0	0	0	1	0	2.95988	0	11	1	0	0	0
0	0	1	0	0	0	3.10392	1	22514	1	1	0	1
0	1	0	0	0	0	3.10538	1	434	0	1	0	0
3	0	0	1	0	0	3.42037	1	18253	1	1	0	1
0	0	0	1	0	0	3.48506	1	3287	1	1	0	1
0	0	1	0	0	0	3.54277	1	53678	1	1	0	1
0	0	1	0	0	0	3.54291	1	52168	1	1	0	1
0	0	0	0	1	0	3.549	0	144	1	0	0	0
0	1	0	0	0	0	3.71517	1	160714	1	0	0	1
3	0	0	1	0	0	3.81528	1	168041	1	1	0	1
0	1	0	0	0	0	3.93726	1	1000248	1	0	0	1
0	0	0	0	0	0	3.97627	0	1790	1	0	1	0
0	0	0	0	0	0	4.14956	0	752	0	1	0	0
Sample2
y	ac1	ac2	ac3	s1	s2	delay	ac	fol	tag	url	pic	vid
117	1	0	0	1	0	0.00165509	1	589555	0	0	0	0
4	1	0	0	1	0	0.010162	1	1131437	1	0	0	0
11	1	0	0	0	1	0.0113194	1	182769	1	0	1	0
61	1	0	0	1	0	0.011713	1	1040461	1	0	1	0
1	1	0	0	1	0	0.0127199	1	489053	1	0	1	0
4625	0	1	0	1	0	0.0156829	1	11313440	1	0	0	1
1162	0	1	0	0	0	0.0158796	1	28266711	1	1	1	0
2520	0	1	0	1	0	0.0160301	1	4407402	1	0	1	0
24	1	0	0	0	0	0.0160532	1	2370847	0	0	0	0
0	0	0	0	1	0	0.016088	0	117	1	0	0	0
5	0	1	0	0	0	0.0163194	1	2112839	1	0	1	0
1157	0	1	0	1	0	0.0165278	1	23247171	1	0	0	0
413	0	1	0	1	0	0.0167593	1	3301441	1	0	0	0
9	1	0	0	1	0	0.0169444	1	48414	0	0	0	0
2	1	0	0	1	0	0.0170833	1	575343	0	1	1	0
49	0	1	0	1	0	0.0172106	1	2261580	1	0	1	0
225	0	1	0	0	0	0.0173611	1	102957594	1	0	0	0
0	0	1	0	1	0	0.0174074	1	1821698	1	0	1	0
0	0	0	0	1	0	0.0174884	0	275	1	0	1	0
0	1	0	0	1	0	0.0175347	1	642354	1	0	1	0
36	0	1	0	1	0	0.0176852	1	18934	0	0	0	0
603	0	1	0	1	0	0.0177083	1	24600438	1	1	0	1
58	0	1	0	0	0	0.0178472	1	8306654	1	0	0	0
864	0	1	0	0	0	0.0178704	1	23783988	1	0	1	0
618	0	1	0	0	0	0.0179167	1	20405156	0	1	0	0
1	1	0	0	1	0	0.0179398	1	175662	0	0	1	0
0	0	1	0	0	0	0.0181713	1	2540900	1	1	1	0
18	1	0	0	1	0	0.0183565	1	1337953	1	0	1	0
0	0	0	0	1	0	0.0186921	0	1	0	0	0	0
1363	1	0	0	1	0	0.0189931	1	4314763	1	0	1	0
106	0	1	0	1	0	0.0190046	1	21812889	1	0	0	1
97	1	0	0	1	0	0.0190162	1	5686817	0	0	0	0
4	1	0	0	0	0	0.0190625	1	389798	1	0	0	0
0	0	0	0	1	0	0.0190741	0	450	0	0	0	0
38	0	0	1	0	1	0.0191667	1	28947	0	0	1	0
28	0	1	0	0	1	0.019294	1	9713498	0	0	1	0
136	0	1	0	1	0	0.0193171	1	1792562	1	1	0	0
18	0	1	0	1	0	0.0194329	1	4908458	1	0	0	0
0	1	0	0	1	0	0.0195255	1	8018485	1	0	0	1
107	1	0	0	1	0	0.0195486	1	192424	1	0	1	0
0	0	0	1	0	0	0.0195949	1	2193119	1	0	1	0
52	1	0	0	0	0	0.0198611	1	854930	0	0	1	0
38	0	1	0	0	0	0.0199537	1	7064878	1	1	0	0
0	1	0	0	0	0	0.0200116	1	162466	0	0	0	0
1	0	0	0	0	0	0.020081	0	678120	0	0	1	0
63	1	0	0	1	0	0.0201389	1	38066	1	0	1	0
101	0	1	0	1	0	0.0201736	1	925721	1	0	0	0
70	1	0	0	1	0	0.0201852	1	903311	1	0	1	0
0	0	0	0	1	0	0.0201968	0	1460	1	0	0	0
3	1	0	0	1	0	0.0203704	1	2945584	1	0	1	0
83	1	0	0	1	0	0.0204398	1	1403494	1	0	0	1
0	0	1	0	0	0	0.0205093	1	44519352	1	0	0	0
0	0	0	0	1	0	0.0205787	0	0	1	0	0	0
0	0	1	0	1	0	0.0208333	1	205401	1	0	0	1
3	0	0	1	1	0	0.0208565	1	464996	1	0	0	1
1108	0	1	0	1	0	0.0209375	1	11281267	1	0	0	0
0	0	1	0	0	0	0.0210995	1	8184641	1	0	0	0
0	0	1	0	0	0	0.0211343	1	8115230	1	0	1	0
0	0	0	0	1	0	0.0212847	0	2229	1	0	0	0
49	0	1	0	1	0	0.0212847	1	37687966	1	0	0	0
8	1	0	0	0	0	0.0213542	1	1013790	1	0	1	0
287	0	1	0	1	0	0.0213657	1	59470752	1	1	0	0
67	0	1	0	1	0	0.0213657	1	40670518	1	1	0	0
67	1	0	0	0	0	0.0213657	1	7108391	1	0	1	0
32	0	0	0	1	0	0.0214931	0	14629	1	0	1	0
6	1	0	0	1	0	0.0216319	1	919158	1	0	1	0
1	0	0	0	0	0	0.0216667	0	598	1	0	0	0
0	1	0	0	0	0	0.021713	1	669584	0	0	1	0
0	0	1	0	1	0	0.0217708	1	3109014	1	0	0	1
0	1	0	0	1	0	0.0218981	1	1061348	1	0	1	0
11	0	1	0	0	0	0.0219329	1	5495335	1	1	0	0
2	0	1	0	1	0	0.0219792	1	2067886	1	0	0	1
0	0	1	0	1	0	0.0220949	1	21220450	1	0	0	0
0	0	0	0	1	0	0.0221528	0	186	1	0	0	0
23	1	0	0	0	0	0.0222222	1	1987333	1	0	0	0
0	0	1	0	1	0	0.0224074	1	0	1	0	0	1
0	0	0	0	1	0	0.0224537	0	118	1	0	0	0
0	0	1	0	1	0	0.0225116	1	2652741	1	0	0	1
2	1	0	0	0	1	0.0225116	1	1026923	1	0	1	0
2	1	0	0	1	0	0.0225926	1	1367	1	0	1	0
0	1	0	0	0	0	0.0226042	1	2817600	1	1	1	0
0	0	0	0	1	0	0.0226852	0	394	1	0	0	0
0	1	0	0	1	0	0.0227199	1	5490	1	0	0	0
0	0	0	0	1	0	0.0227778	0	102	1	0	1	0
0	0	0	0	1	0	0.0228125	0	53	1	0	0	0
0	0	0	0	0	0	0.0228819	0	139	1	0	0	0
0	1	0	0	1	0	0.0229514	1	1147200	1	0	1	0
0	1	0	0	1	0	0.0229745	1	277	0	0	0	0
0	0	0	0	1	0	0.0231019	0	324	1	0	0	0
0	1	0	0	0	0	0.0231481	1	320334	1	0	0	0
0	1	0	0	1	0	0.0231597	1	481801	1	0	1	0
0	1	0	0	1	0	0.0231713	1	578	1	0	0	0
0	0	0	0	0	0	0.0233333	0	21	1	0	0	0
0	0	0	0	1	0	0.0233449	0	130	1	0	0	0
0	0	0	0	1	0	0.0235185	0	802	1	0	1	0
0	0	0	0	1	0	0.0235301	0	472	1	0	0	0
0	0	0	0	1	0	0.0235648	0	96	1	0	0	0
0	1	0	0	1	0	0.0235648	1	322	1	0	1	0
0	0	0	0	1	0	0.0235648	0	1143	1	0	0	0
0	0	0	0	1	0	0.0236458	0	607	1	0	0	0
0	1	0	0	1	0	0.0236806	1	128	1	0	0	0
0	0	0	0	1	0	0.0237963	0	164	1	0	0	0
0	0	0	0	1	0	0.0238079	0	1	1	0	0	0
1	0	0	0	0	0	0.0238194	0	73307	1	0	0	0
0	0	0	0	1	0	0.023831	0	106	1	0	0	0
0	0	0	0	1	0	0.0238657	0	52	1	0	0	0
1	1	0	0	1	0	0.0238889	1	1763502	0	0	0	0
0	0	0	0	1	0	0.0239468	0	1	1	0	0	0
0	0	0	0	1	0	0.0241319	0	1	1	0	1	0
1	0	0	0	1	0	0.0241782	0	128	1	0	0	0
0	1	0	0	1	0	0.0242245	1	7014708	0	0	0	0
0	0	1	0	0	0	0.0243056	1	4509332	1	0	0	1
0	1	0	0	1	0	0.0243171	1	277326	1	0	1	0
1	1	0	0	1	0	0.0243171	1	124530	1	0	1	0
1	1	0	0	1	0	0.0243634	1	383	1	0	0	0
0	0	0	0	1	0	0.024375	0	15035	1	0	1	0
0	0	1	0	1	0	0.0243866	1	931900	1	0	0	0
14	1	0	0	0	1	0.0243866	1	301951	1	0	1	0
0	0	0	1	1	0	0.0243866	1	350604	1	0	0	1
0	0	0	0	1	0	0.0244676	0	65	1	0	0	0
1	1	0	0	1	0	0.0245255	1	8093	1	0	1	0
21	1	0	0	0	0	0.0245718	1	1973373	1	0	1	0
1	0	0	0	1	0	0.0245833	0	1804	1	0	0	0
0	0	1	0	0	0	0.0246065	1	47749615	1	0	0	0
0	0	0	0	1	0	0.0246759	0	129	1	0	0	0
0	0	0	0	0	0	0.0246991	0	5226	0	0	0	0
0	1	0	0	0	0	0.0247222	1	603508	1	0	0	1
0	0	0	0	1	0	0.0247338	0	0	1	0	0	0
0	0	0	0	0	0	0.0248032	0	57	1	0	0	0
1	0	1	0	1	0	0.0248148	1	983765	0	0	0	0
5	0	0	0	1	0	0.0248264	0	463	1	0	0	0
35	1	0	0	1	0	0.0248495	1	12715	0	0	0	0
0	0	0	0	1	0	0.0249421	0	56	1	0	0	0
0	0	0	0	1	0	0.0249421	0	63	1	0	0	0
0	0	0	0	1	0	0.0249421	0	1231	0	0	1	0
0	0	0	0	1	0	0.0249537	0	1440	1	0	0	0
0	0	0	0	1	0	0.0249537	0	104	1	0	0	0
161	0	1	0	1	0	0.0249653	1	102961887	1	0	0	0
0	0	0	0	1	0	0.0249653	0	83	0	0	0	0
0	1	0	0	1	0	0.0249884	1	1054	1	0	0	0
0	0	0	0	1	0	0.0250116	0	173	1	0	0	0
0	0	0	0	1	0	0.0250463	0	138	0	0	0	0
0	0	0	0	1	0	0.0250579	0	4	1	0	0	0
0	1	0	0	1	0	0.0251157	1	389	1	0	0	0
0	0	1	0	0	0	0.0252315	1	2481567	1	1	1	0
3	1	0	0	1	0	0.0252431	1	1783440	1	0	1	0
0	0	0	0	1	0	0.0252431	0	127	1	0	0	0
0	0	1	0	1	0	0.0252662	1	2936946	1	1	0	0
0	0	1	0	1	0	0.0253009	1	18301	0	0	0	0
0	0	0	0	1	0	0.0253241	0	97	1	0	0	0
0	0	0	0	1	0	0.0253241	0	439	1	0	0	0
0	0	0	0	0	0	0.0253356	0	392	0	1	1	0
0	0	0	0	1	0	0.0253819	0	42	1	0	0	0
0	0	0	1	1	0	0.0253935	1	14474	0	0	0	0
0	0	0	0	1	0	0.0254167	0	65	1	0	0	0
0	0	0	0	1	0	0.0254167	0	49	1	0	1	0
0	0	0	0	0	0	0.0254167	0	1584	1	0	0	0
0	0	0	0	1	0	0.0254398	0	133	1	0	1	0
0	0	0	0	1	0	0.0254514	0	1068	1	0	0	0
0	0	0	0	1	0	0.025463	0	991	1	0	0	0
0	0	0	0	1	0	0.025463	0	35	1	0	0	0
0	0	0	0	1	0	0.0254745	0	512	0	0	0	0
0	0	0	0	1	0	0.0254745	0	121	1	0	1	0
0	0	0	0	1	0	0.0254977	0	484	1	0	0	0
19	1	0	0	1	0	0.0255093	1	190253	1	0	0	0
0	0	0	0	1	0	0.0255093	0	386	1	0	0	0
0	0	0	0	1	0	0.0255208	0	178	1	0	0	0
0	0	0	0	1	0	0.0255324	0	393	1	0	0	0
0	1	0	0	1	0	0.025544	1	14085	1	0	0	0
0	1	0	0	1	0	0.025544	1	1238	1	0	0	0
0	0	0	0	0	1	0.025544	0	51	1	0	0	0
0	0	0	0	0	1	0.0255671	0	177	1	0	0	0
0	0	0	0	0	0	0.0255671	0	305	1	0	0	0
0	0	0	0	0	0	0.0255671	0	568	1	0	0	0
0	0	0	0	1	0	0.0255787	0	436	0	0	0	0
0	1	0	0	1	0	0.0256019	1	33020	0	0	1	0
0	1	0	0	1	0	0.0256019	1	184	1	0	0	0
0	1	0	0	0	1	0.0256134	1	279	1	0	0	0
0	0	0	0	1	0	0.0256134	0	245	1	0	0	0
0	0	0	0	0	1	0.0256134	0	88	1	0	1	0
0	0	0	0	1	0	0.0256134	0	402	0	0	0	0
0	0	0	0	1	0	0.0256134	0	109	0	0	0	0
0	1	0	0	1	0	0.0256134	1	2420	1	0	1	0
0	0	0	0	1	0	0.025625	0	382	1	0	0	0
0	0	0	0	1	0	0.025625	0	96	1	0	0	0
0	0	0	0	1	0	0.025625	0	119	1	0	0	0
0	1	0	0	1	0	0.025625	1	1346	1	0	0	0
0	0	0	0	1	0	0.025625	0	47	1	0	0	0
0	0	0	0	1	0	0.025625	0	428	1	0	0	0
0	0	0	0	1	0	0.0256366	0	684	1	0	0	0
0	0	0	0	1	0	0.0256366	0	392	1	0	0	0
0	0	0	0	1	0	0.0256366	0	94	1	0	1	0
0	0	0	0	1	0	0.0256597	0	87	1	0	0	0
0	0	0	0	1	0	0.0256597	0	97	1	0	0	0
0	0	0	0	1	0	0.0256597	0	334	1	0	0	0
0	0	0	0	1	0	0.0256597	0	108	1	0	0	0
0	0	0	0	1	0	0.0256713	0	92	1	0	0	0
0	1	0	0	1	0	0.0256829	1	151	1	0	0	0
0	0	0	0	1	0	0.0256829	0	118	1	0	0	0
0	0	0	0	1	0	0.0256829	0	381	1	0	0	0
0	0	0	0	1	0	0.0256829	0	36	1	0	0	0
0	1	0	0	1	0	0.0256944	1	1506	1	0	0	0
0	0	0	0	0	1	0.025706	0	176	1	0	0	0
0	1	0	0	1	0	0.025706	1	3662662	1	0	1	0
0	0	0	0	1	0	0.0257176	0	95	1	0	0	0
0	0	0	0	1	0	0.0257292	0	335	1	0	0	0
0	0	0	0	1	0	0.0257523	0	59	1	0	0	0
0	0	0	0	1	0	0.0257523	0	60	1	0	0	0
0	0	0	0	1	0	0.0257523	0	80	1	0	0	0
0	1	0	0	1	0	0.0257523	1	1465366	1	0	0	0
0	0	0	0	1	0	0.0257639	0	102	1	0	0	0
0	1	0	0	1	0	0.0257639	1	5586	1	0	0	0
0	0	0	0	1	0	0.0257639	0	76	1	0	0	0
0	0	0	0	1	0	0.025787	0	1095	1	0	1	0
0	0	0	0	0	0	0.025787	0	68	1	0	0	0
0	0	0	0	1	0	0.0258102	0	307	1	0	0	0
0	0	0	0	1	0	0.0258102	0	5	1	0	0	0
0	0	0	0	1	0	0.0258102	0	246	1	0	0	0
0	0	0	0	1	0	0.0258102	0	58	1	0	0	0
0	0	0	0	1	0	0.0258102	0	304	1	0	0	0
0	0	0	0	1	0	0.0258218	0	160	1	0	0	0
0	0	0	0	1	0	0.0258218	0	42	1	0	0	0
0	0	0	0	1	0	0.0258218	0	186	1	0	0	0
0	0	0	0	1	0	0.0258333	0	161	1	0	0	0
0	0	0	0	1	0	0.0258333	0	54	1	0	0	0
0	0	0	0	1	0	0.0258333	0	21524	1	0	0	0
0	0	0	0	1	0	0.0258333	0	146	1	0	0	0
0	0	0	0	1	0	0.0258449	0	18	1	0	0	0
0	1	0	0	1	0	0.0258449	1	10834	1	0	0	0
0	0	0	0	1	0	0.0258449	0	123	1	0	0	0
0	0	0	0	1	0	0.0258449	0	59	1	0	0	0
0	0	0	0	1	0	0.0258565	0	252	1	0	0	0
0	0	0	0	0	0	0.0258565	0	146	1	0	0	0
0	1	0	0	0	0	0.0258565	1	1783	1	0	0	0
0	1	0	0	1	0	0.0258565	1	1753	1	0	0	0
0	1	0	0	1	0	0.0258565	1	579	1	0	0	0
0	1	0	0	1	0	0.0258565	1	143	1	0	0	0
0	0	0	0	1	0	0.0258796	0	180	1	0	0	0
0	1	0	0	1	0	0.0258796	1	1125	0	0	0	0
0	0	0	0	0	1	0.0258796	0	50	1	0	0	0
0	0	0	0	1	0	0.0258912	0	113	1	0	0	0
0	0	1	0	1	0	0.0258912	1	23272	0	0	0	0
0	0	0	0	1	0	0.0258912	0	66	1	0	0	0
0	1	0	0	0	1	0.0258912	1	863	1	0	0	0
0	0	0	0	1	0	0.0259028	0	85	1	0	0	0
0	0	0	0	1	0	0.0259028	0	225	1	0	0	0
0	0	0	0	1	0	0.0259144	0	44	1	0	1	0
0	0	0	0	1	0	0.0259259	0	427	0	0	0	0
0	0	0	0	1	0	0.0259259	0	25	1	0	0	0
0	0	0	0	1	0	0.0259259	0	289	1	0	0	0
0	0	0	0	1	0	0.0259259	0	803	1	0	0	0
0	0	0	0	1	0	0.0259259	0	82	1	0	0	0
0	0	0	0	1	0	0.0259259	0	413	0	0	0	0
0	0	0	0	1	0	0.0259375	0	175	0	0	0	0
0	0	0	0	1	0	0.0259375	0	82	1	0	0	0
0	1	0	0	1	0	0.0259375	1	303	1	0	0	0
0	0	0	0	1	0	0.0259491	0	110	1	0	0	0
0	0	0	0	1	0	0.0259491	0	192	1	0	0	0
1	0	0	0	0	1	0.0259606	0	110	1	0	0	0
0	0	0	0	1	0	0.0259606	0	84	1	0	0	0
0	0	0	0	1	0	0.0259606	0	146	1	0	0	0
0	0	0	0	1	0	0.0259606	0	48	1	0	0	0
0	0	0	0	1	0	0.0259606	0	60	1	0	0	0
0	0	0	0	0	1	0.0259606	0	98	1	0	0	0
0	0	0	0	1	0	0.0259722	0	117	1	0	0
0	0	0	0	1	0	0.0259722	0	212	1	0	0	0
0	0	0	0	1	0	0.0259722	0	119	1	0	0	0
0	0	0	0	1	0	0.0259838	0	385	0	0	0	0
0	0	0	0	1	0	0.0259838	0	85	1	0	0	0
0	1	0	0	1	0	0.0259838	1	1497	1	0	1	0
0	0	0	0	0	0	0.0259954	0	14	1	0	0	0
0	0	0	0	1	0	0.0259954	0	120	1	0	0	0
0	1	0	0	0	0	0.0260069	1	125625	1	0	0	0
1	0	1	0	1	0	0.0260069	1	128564	0	1	0	0
0	0	0	0	1	0	0.0260069	0	579	1	0	0	0
0	0	0	0	1	0	0.0260185	0	91	1	0	0	0
0	0	1	0	0	0	0.0260301	1	2050176	1	0	0	1
0	1	0	0	1	0	0.0260301	1	638241	1	0	1	0
2	1	0	0	1	0	0.0260301	1	218643	1	0	1	0
0	1	0	0	1	0	0.0260417	1	119	1	0	0	0
0	1	0	0	0	0	0.0260417	1	1610037	1	0	1	0
0	0	0	0	1	0	0.0260417	0	239	1	0	0	0
0	0	0	0	1	0	0.0260417	0	336	1	0	0	0
0	0	0	0	1	0	0.0260417	0	37	1	0	0	0
0	1	0	0	1	0	0.0260648	1	166	1	0	0	0
1	0	0	1	0	0	0.0260764	1	1510587	1	0	0	0
0	0	0	0	1	0	0.0260764	0	30	1	0	0	0
0	0	0	0	1	0	0.026088	0	1924	1	0	0	0
0	1	0	0	1	0	0.026088	1	104	1	0	0	0
0	0	0	0	1	0	0.026088	0	97	1	0	0	0
1	1	0	0	0	0	0.026088	1	989992	1	0	0	0
0	1	0	0	0	1	0.026088	1	41721	1	0	0	0
0	0	0	0	1	0	0.0260995	0	100	1	0	0	0
0	1	0	0	1	0	0.0260995	1	621	1	0	0	0
0	0	0	0	1	0	0.0260995	0	249	1	0	0	0
0	1	0	0	1	0	0.0260995	1	560	1	0	0	0
0	1	0	0	1	0	0.0261111	1	1477	1	0	0	0
0	0	0	0	1	0	0.0261111	0	344	1	0	0	0
0	0	0	0	1	0	0.0261111	0	468	1	0	1	0
0	1	0	0	1	0	0.0261111	1	506	1	0	0	0
0	0	0	0	1	0	0.0261111	0	170	1	0	0	0
0	0	0	0	1	0	0.0261111	0	80	1	0	0	0
0	0	0	0	1	0	0.0261111	0	286	0	0	0	0
0	1	0	0	1	0	0.0261343	1	589555	0	0	0	0
0	0	0	0	1	0	0.0261343	0	54	1	0	0	0
0	0	0	0	1	0	0.0261343	0	156	1	0	0	0
0	1	0	0	1	0	0.0261343	1	609	1	0	0	0
0	1	0	0	1	0	0.0261343	1	3551	1	0	0	0
0	0	0	0	0	0	0.0261343	0	182	1	0	0	0
2	0	1	0	0	0	0.0261343	1	1249715	1	0	0	0
0	1	0	0	1	0	0.0261458	1	190	1	0	0	0
0	0	0	0	1	0	0.0261458	0	89	1	0	0	0
0	0	0	0	0	1	0.0261458	0	20	1	0	0	0
0	0	0	0	1	0	0.0261574	0	9	1	0	0	0
0	0	0	0	0	1	0.0261574	0	54	1	0	0	0
0	0	0	0	1	0	0.0261574	0	53	1	0	0	0
0	1	0	0	1	0	0.0261574	1	116	1	0	0	0
0	0	0	0	1	0	0.0261574	0	880	1	0	0	0
0	0	0	0	1	0	0.0261574	0	612	1	0	0	0
0	1	0	0	1	0	0.0261574	1	2084	1	0	1	0
0	0	0	0	1	0	0.0261574	0	255	0	0	0	0
0	0	0	0	0	0	0.026169	0	927	1	0	1	0
0	0	0	0	1	0	0.026169	0	220	1	0	0	0
0	0	0	0	1	0	0.026169	0	60	1	0	0	0
0	0	0	0	1	0	0.0261806	0	106	1	0	0	0
0	0	0	0	0	0	0.0261806	0	86	1	0	0	0
0	0	0	0	1	0	0.0261806	0	535	0	1	0	0
0	0	0	0	1	0	0.0261806	0	190	1	0	0	0
0	0	0	0	1	0	0.0261806	0	99	1	0	0	0
0	0	0	0	0	1	0.0261806	0	13	1	0	1	0
0	0	0	0	0	0	0.0261921	0	46	1	0	0	0
0	0	0	0	1	0	0.0261921	0	81	1	0	0	0
0	0	0	0	0	0	0.0261921	0	264	1	0	0	0
0	0	0	0	1	0	0.0261921	0	292	1	0	0	0
0	0	0	0	1	0	0.0261921	0	110	1	0	0	0
0	0	0	0	0	0	0.0261921	0	130	1	0	0	0
0	0	0	0	1	0	0.0262037	0	135	1	0	0	0
0	0	0	0	1	0	0.0262037	0	112	1	0	0	0
0	1	0	0	1	0	0.0262037	1	216	1	0	0	0
0	0	0	0	1	0	0.0262037	0	1330	1	0	1	0
0	0	0	0	1	0	0.0262037	0	14	1	0	0	0
0	0	0	0	1	0	0.0262153	0	152	1	0	0	0
0	1	0	0	1	0	0.0262153	1	223	1	0	0	0
0	0	0	0	1	0	0.0262153	0	120	1	0	0	0
0	0	0	0	1	0	0.0262153	0	67	1	0	0	0
0	0	0	0	1	0	0.0262153	0	169	1	0	0	0
0	0	0	0	1	0	0.0262153	0	236	0	0	0	0
0	1	0	0	1	0	0.0262153	1	1196	1	0	0	0
0	0	0	0	1	0	0.0262153	0	96	1	0	0	0
0	0	0	0	0	1	0.0262153	0	199	0	0	0	0
0	0	0	0	1	0	0.0262153	0	10675	0	0	1	0
28	1	0	0	0	0	0.0262153	1	3802679	1	0	0	1
0	1	0	0	1	0	0.0262269	1	161325	1	0	1	0
0	0	0	0	1	0	0.0262269	0	37	1	0	0	0
0	0	0	0	1	0	0.0262269	0	119	1	0	0	0
0	0	0	1	0	0	0.0262269	1	12309	1	1	1	0
0	0	0	0	1	0	0.0262384	0	180	1	0	0	0
0	0	0	0	1	0	0.0262384	0	1007	1	0	0	0
0	0	0	0	1	0	0.02625	0	24	1	0	0	0
0	0	0	0	1	0	0.02625	0	39	1	0	0	0
0	0	0	0	1	0	0.02625	0	321	1	0	0	0
0	0	0	0	1	0	0.02625	0	32	1	0	0	0
0	0	0	0	1	0	0.02625	0	100	1	0	0	0
0	1	0	0	1	0	0.02625	1	432	1	0	0	0
0	1	0	0	1	0	0.0262616	1	726	1	0	0	0
0	0	0	0	1	0	0.0262616	0	92	1	0	0	0
0	1	0	0	1	0	0.0262616	1	592	1	0	0	0
0	0	0	0	1	0	0.0262616	0	8	1	0	0	0
0	0	0	0	1	0	0.0262616	0	139	1	0	0	0
0	0	0	0	1	0	0.0262731	0	31	1	0	0	0
0	0	0	0	1	0	0.0262731	0	34	1	0	0	0
0	1	0	0	1	0	0.0262731	1	105	1	0	0	0
0	1	0	0	1	0	0.0262731	1	19235	1	0	1	0
0	0	1	0	1	0	0.0262847	1	178615	1	1	0	1
0	1	0	0	1	0	0.0262847	1	63	1	0	0	0
0	0	1	0	1	0	0.0262847	1	391998	1	0	0	1
0	0	0	0	1	0	0.0262963	0	530	1	0	0	0
0	0	0	0	1	0	0.0262963	0	157	1	0	0	0
0	0	0	0	1	0	0.0262963	0	19	1	0	0	0
0	0	0	0	1	0	0.0263079	0	34	1	0	1	0
0	0	0	0	0	0	0.0263194	0	99	1	0	0	0
0	0	0	0	0	1	0.0263426	0	471	1	0	0	0
0	1	0	0	1	0	0.0263542	1	909	1	0	0	0
0	0	1	0	1	0	0.0263542	1	867224	1	0	0	0
0	0	0	0	0	0	0.026412	0	20	1	0	0	0
0	1	0	0	0	0	0.0264468	1	567	1	0	0	0
0	0	0	0	0	0	0.0264931	0	125	1	0	0	0
0	0	0	0	1	0	0.0265509	0	204	1	0	0	0
0	0	0	0	0	0	0.0266435	0	194	0	0	0	0
0	0	0	0	1	0	0.0267708	0	3	0	0	0	0
7	1	0	0	1	0	0.0268634	1	2264135	1	0	1	0
0	0	0	0	1	0	0.0271528	0	16	1	0	1	0
0	1	0	0	1	0	0.0271644	1	1382055	1	1	1	0
0	1	0	0	1	0	0.0272569	1	1142322	1	0	1	0
0	0	0	0	1	0	0.0272917	0	54	0	0	0	0
1	1	0	0	1	0	0.0272917	1	929	1	0	1	0
0	0	1	0	1	0	0.0273264	1	3301441	1	0	0	1
1	0	0	0	1	0	0.0274074	0	71306	1	0	0	0
0	1	0	0	1	0	0.027419	1	15675	1	0	1	0
1032	0	1	0	1	0	0.0276968	1	71271920	1	0	0	0
0	1	0	0	1	0	0.0279051	1	1201270	1	0	0	1
0	0	0	0	1	0	0.0279398	0	56	1	0	0	0
0	1	0	0	1	0	0.0279514	1	101940	1	0	0	0
0	0	0	0	1	0	0.0279514	0	24	1	0	0	0
0	0	0	0	1	0	0.0279977	0	74	1	0	0	0
0	1	0	0	1	0	0.0280324	1	181434	1	0	1	0
0	0	0	1	1	0	0.0280324	1	6541612	0	0	0	0
0	1	0	0	1	0	0.028044	1	10375	1	0	1	0
0	1	0	0	1	0	0.0281713	1	1403494	1	0	1	0
0	0	0	0	1	0	0.0284606	0	15	1	0	1	0
0	1	0	0	1	0	0.0284606	1	645	1	0	0	0
0	0	0	0	1	0	0.0284838	0	2	1	0	0	0
0	0	0	0	1	0	0.0284838	0	46	1	0	0	0
0	1	0	0	1	0	0.0284838	1	2982	1	0	0	0
0	0	0	0	1	0	0.0286806	0	90	1	0	0	0
0	0	0	0	1	0	0.0287153	0	52	1	0	0	0
0	1	0	0	1	0	0.0289005	1	11030512	1	0	0	0
0	0	0	0	1	0	0.0291204	0	349	1	0	0	0
0	0	1	0	1	0	0.0291319	1	542190	1	0	1	0
116	0	1	0	0	1	0.0292593	1	28281809	1	1	0	1
0	0	0	0	1	0	0.0293866	0	104	1	0	0	0
0	0	0	0	1	0	0.0293866	0	30	1	0	0	0
0	0	0	0	1	0	0.0293981	0	19	1	0	0	0
0	1	0	0	1	0	0.0294792	1	531	0	0	1	0
0	1	0	0	1	0	0.0297569	1	1398	1	0	0	0
0	1	0	0	1	0	0.0301042	1	692351	1	0	0	1
0	0	0	0	1	0	0.0302199	0	192	1	0	0	0
0	1	0	0	0	1	0.0303125	1	1419	1	0	0	0
0	0	0	0	0	1	0.0303241	0	228	1	0	0	0
84	0	0	1	1	0	0.0303241	1	403026	1	0	0	0
0	0	0	0	1	0	0.0306713	0	29	1	0	0	0
0	0	0	0	1	0	0.0307176	0	82	1	0	0	0
0	1	0	0	1	0	0.0309722	1	1047	1	0	1	0
0	0	0	0	1	0	0.0309838	0	103	1	0	1	0
0	1	0	0	1	0	0.0309954	1	822332	1	0	0	1
0	0	0	0	1	0	0.0311458	0	76	1	0	0	0
0	0	0	0	1	0	0.0312384	0	45	1	0	0	0
0	0	0	0	1	0	0.0313542	0	118	0	0	0	0
0	0	0	0	1	0	0.0318287	0	43	1	0	0	0
0	0	0	0	0	0	0.0318866	0	11	1	0	0	0
0	0	0	0	1	0	0.0319907	0	1	1	0	0	0
0	0	0	0	1	0	0.032037	0	2	1	0	0	0
0	0	0	0	1	0	0.0320949	0	4	0	0	1	0
0	0	1	0	1	0	0.0322106	1	1302677	1	0	0	1
0	0	0	0	1	0	0.0322222	0	1	1	0	1	0
0	0	1	0	0	0	0.0323495	1	110672	1	0	0	1
0	0	0	0	1	0	0.0325116	0	171	1	0	0	0
Sample3
y	ac1	ac2	ac3	s1	s2	delay	ac	fol	tag	url	pic	vid
16	1	0	0	0	0	0.523981	1	220719	1	1	0	0
437	0	1	0	0	0	0.533565	1	40430400	1	1	0	0
5	0	1	0	0	1	0.54441	1	6412879	0	1	1	0
0	1	0	0	0	1	0.562118	1	193999	1	0	0	0
0	1	0	0	0	0	0.573009	1	22756	0	0	0	0
1	0	1	0	0	0	0.604896	1	3292982	0	1	0	0
0	1	0	0	0	0	0.609641	1	947	0	1	0	0
0	0	1	0	0	0	0.610035	1	79557	0	0	0	0
0	0	0	0	0	0	0.684803	0	132269	0	0	0	0
1	0	1	0	0	0	0.760451	1	3292982	0	1	0	0
0	1	0	0	0	0	0.771701	1	126775	0	1	1	0
0	1	0	0	0	0	0.775116	1	66946	0	0	0	0
1	1	0	0	0	0	0.788831	1	370970	0	1	0	0
0	1	0	0	1	0	0.792616	1	142556	0	1	0	0
0	0	0	0	0	0	0.79787	0	7847	1	1	1	0
10	0	1	0	0	0	0.799074	1	10104546	1	1	0	0
0	0	1	0	0	0	0.800139	1	942399	1	1	0	0
1	1	0	0	0	1	0.808333	1	472161	0	1	0	0
0	1	0	0	0	0	0.8125	1	812581	1	0	0	0
0	1	0	0	0	0	0.815359	1	6091	1	0	1	0
1	1	0	0	0	0	0.816377	1	1749386	0	0	1	0
0	1	0	0	0	0	0.817384	1	25323	0	1	0	0
0	1	0	0	0	0	0.818704	1	2339539	1	1	0	0
5	1	0	0	1	0	0.819259	1	718863	1	0	1	0
2	1	0	0	0	0	0.821354	1	406680	0	1	0	0
0	0	1	0	0	0	0.822894	1	5044157	1	1	0	0
0	0	1	0	0	0	0.824757	1	10304349	0	1	0	0
0	0	0	0	0	0	0.825069	0	16263	0	1	0	0
29	1	0	0	1	0	0.826551	1	1289676	0	0	1	0
0	1	0	0	0	0	0.829248	1	16851	0	1	0	0
2	0	1	0	0	0	0.831806	1	1436986	1	1	0	0
0	1	0	0	0	0	0.832303	1	211646	0	1	0	0
0	0	1	0	0	0	0.833368	1	11602081	0	1	0	0
5	0	0	0	0	0	0.8339	0	867	1	0	0	0
0	1	0	0	0	0	0.83478	1	38613	1	0	0	0
0	0	1	0	0	0	0.836308	1	32581	0	1	0	0
1	1	0	0	0	0	0.842951	1	609422	0	0	0	0
0	0	0	0	1	0	0.851979	0	7	0	1	0	0
0	0	1	0	0	0	0.853356	1	43574848	1	0	0	0
0	0	1	0	0	0	0.854201	1	7412704	0	1	0	0
3	1	0	0	0	0	0.854329	1	222241	1	0	0	0
0	0	1	0	0	0	0.858924	1	11432	0	1	0	0
0	1	0	0	0	0	0.866019	1	32643	0	1	0	0
1	0	1	0	0	1	0.868206	1	18475	0	0	0	0
2	1	0	0	0	1	0.870845	1	194095	1	0	1	0
0	0	1	0	0	0	0.87434	1	646856	0	1	0	0
2	0	1	0	0	0	0.875648	1	2409014	1	0	1	0
0	0	1	0	0	1	0.876539	1	55368165	1	0	0	0
0	0	1	0	0	0	0.876898	1	239285	1	1	0	0
0	0	1	0	0	0	0.878183	1	32581	1	0	0	0
44	1	0	0	0	1	0.878553	1	803240	1	0	0	0
3	0	1	0	0	0	0.879016	1	3827567	0	1	0	0
0	0	1	0	0	0	0.880023	1	1603356	0	0	0	0
0	1	0	0	1	0	0.889086	1	294224	1	0	1	0
0	1	0	0	0	0	0.893241	1	177409	1	0	0	0
0	1	0	0	1	0	0.893565	1	1931548	1	0	1	0
0	0	1	0	0	0	0.894479	1	59323	0	0	0	0
0	0	0	0	0	1	0.895926	0	13	0	1	0	0
0	0	1	0	0	0	0.899398	1	91399	1	1	1	0
0	0	1	0	0	0	0.903588	1	9500624	1	1	1	0
1	0	0	0	1	0	0.906551	0	212	1	0	0	0
54	1	0	0	1	0	0.909919	1	199783	0	0	1	0
0	0	0	1	0	0	0.912801	1	1088895	1	1	0	0
0	0	0	0	1	0	0.916806	0	65	0	0	0	0
0	0	1	0	0	0	0.91706	1	1452019	1	0	0	0
0	0	1	0	1	0	0.918032	1	112731	0	0	1	0
7	0	1	0	0	0	0.919745	1	3442416	1	0	1	0
1	1	0	0	1	0	0.924583	1	220719	1	1	0	0
0	1	0	0	0	1	0.927975	1	675134	0	0	0	0
0	0	0	0	1	0	0.929178	0	1	1	0	0	0
1	1	0	0	0	0	0.930255	1	568321	0	0	0	0
0	0	0	0	0	0	0.934479	0	294	0	1	0	0
0	0	0	0	1	0	0.936667	0	24125	1	0	1	0
0	0	0	0	0	0	0.937639	0	25	0	1	0	0
0	0	0	0	0	0	0.94191	0	295	0	1	0	0
1	0	1	0	0	0	0.943183	1	1315941	1	0	0	0
0	0	1	0	0	0	0.948403	1	173235	1	1	0	0
3	1	0	0	1	0	0.948958	1	40799	1	0	1	0
0	1	0	0	0	0	0.960764	1	22735	1	0	1	0
0	0	1	0	0	1	0.965266	1	43574848	1	0	1	0
0	0	1	0	0	0	0.965579	1	761529	1	1	0	0
0	0	1	0	0	1	0.967269	1	239285	1	1	1	0
0	0	0	0	1	0	0.973958	0	79	1	0	0	0
0	1	0	0	1	0	0.982697	1	1177	1	0	0	0
52	0	1	0	0	1	0.99566	1	75742935	1	0	1	0
0	1	0	0	0	1	1.00199	1	153034	1	0	0	0
0	0	1	0	0	1	1.00231	1	20165985	1	0	0	1
0	1	0	0	0	1	1.00285	1	649098	1	0	0	1
0	0	1	0	0	1	1.00363	1	55368165	1	0	0	1
1	0	0	0	0	1	1.00399	0	74	1	0	0	0
0	0	1	0	0	1	1.00656	1	5748299	1	0	1	0
0	0	1	0	0	1	1.00865	1	61894	1	0	0	1
0	1	0	0	0	1	1.01311	1	10084822	0	0	1	0
0	0	1	0	0	1	1.01485	1	155045	1	0	0	1
0	0	0	0	0	0	1.01492	0	47	1	1	0	0
0	0	0	0	1	0	1.01547	0	104	1	0	0	0
0	0	1	0	0	1	1.01919	1	227853	0	0	0	0
0	1	0	0	0	0	1.01994	1	1282986	0	1	0	0
1	0	1	0	0	1	1.02312	1	2301432	0	0	0	1
0	1	0	0	0	1	1.02512	1	1466207	1	1	1	0
0	0	1	0	0	0	1.02912	1	15144	1	0	1	0
7	0	1	0	0	1	1.02992	1	19890463	0	0	0	1
1088	0	1	0	0	1	1.0303	1	23993961	1	1	1	0
25	0	1	0	0	1	1.032	1	59779052	1	1	1	0
4	0	1	0	0	1	1.03294	1	75742935	1	1	1	0
0	0	1	0	0	1	1.03341	1	1071958	0	0	1	0
0	1	0	0	0	1	1.03395	1	25323	0	1	0	0
0	0	0	0	1	0	1.03398	0	391	1	0	0	0
0	0	1	0	0	1	1.03428	1	3660441	0	0	1	0
0	1	0	0	0	1	1.03441	1	437612	1	0	0	1
18	0	1	0	0	1	1.03453	1	1014755	0	0	1	0
25	1	0	0	1	0	1.03534	1	1070300	1	0	0	1
5	1	0	0	0	0	1.03538	1	421674	0	0	0	0
0	0	0	1	0	1	1.03551	1	8143	1	0	0	1
0	0	1	0	0	0	1.03559	1	1603356	0	1	0	0
0	0	0	1	0	1	1.03597	1	34116	0	0	1	0
36	0	1	0	0	0	1.03691	1	40430400	1	1	1	0
0	1	0	0	0	0	1.03694	1	408144	1	1	1	0
1	0	1	0	0	1	1.03696	1	1638412	1	0	1	0
2	0	1	0	0	0	1.0383	1	2122032	1	1	0	0
0	0	1	0	0	1	1.03854	1	60716605	1	0	1	0
0	1	0	0	0	0	1.03902	1	3990	0	0	0	0
0	0	1	0	0	0	1.03905	1	18179628	1	1	1	0
0	0	1	0	0	1	1.03905	1	19682	0	0	1	0
0	0	1	0	1	0	1.03924	1	21401546	1	1	0	0
0	0	1	0	0	1	1.03926	1	5044157	1	0	1	0
2	0	1	0	0	1	1.03931	1	9490090	1	1	1	0
0	0	0	0	1	0	1.03933	0	455530	1	0	0	0
0	1	0	0	0	0	1.03976	1	369692	1	1	0	0
0	0	1	0	0	1	1.03987	1	5748299	1	1	1	0
0	0	0	0	0	0	1.03994	0	228	1	0	0	0
0	0	1	0	0	1	1.04064	1	3973359	1	1	1	0
33	0	1	0	0	1	1.04082	1	26264880	1	0	1	0
0	1	0	0	0	0	1.04106	1	1485661	0	1	0	0
0	0	1	0	0	1	1.0412	1	24054472	1	0	1	0
13	0	1	0	0	0	1.04147	1	47812456	1	1	1	0
2	0	1	0	0	1	1.04155	1	10720147	1	0	1	0
8	0	1	0	0	0	1.04203	1	249048	1	1	1	0
0	0	1	0	0	0	1.04245	1	3439947	1	1	1	0
0	0	1	0	0	1	1.04267	1	89875000	1	0	1	0
0	0	1	0	0	0	1.04271	1	14470946	1	1	1	0
0	0	1	0	0	1	1.04277	1	5096641	1	0	0	0
0	1	0	0	0	1	1.04322	1	318801	1	0	0	1
5	0	1	0	0	1	1.0433	1	18609361	1	1	1	0
0	0	1	0	0	0	1.04334	1	1994497	0	0	0	0
0	1	0	0	0	1	1.04395	1	32910	1	0	1	0
5	1	0	0	0	0	1.04414	1	88778	1	0	1	0
1	0	1	0	0	0	1.04417	1	3292982	0	1	1	0
2	0	1	0	0	0	1.0447	1	4797194	1	0	0	1
32	0	1	0	0	1	1.04485	1	19983103	1	1	1	0
4	0	1	0	0	1	1.045	1	10572612	1	1	1	0
0	0	1	0	0	1	1.04529	1	8755954	1	1	1	0
38	0	1	0	0	1	1.04536	1	10104546	1	0	1	0
1	0	1	0	0	1	1.04543	1	2330581	0	0	0	1
0	1	0	0	0	1	1.04704	1	1094603	1	1	1	0
0	0	1	0	0	1	1.04722	1	20165985	1	1	1	0
3	0	1	0	0	0	1.04744	1	26401310	1	1	1	0
1	1	0	0	0	1	1.04791	1	28657	1	0	1	0
1	0	1	0	0	1	1.04792	1	8184271	1	0	1	0
0	1	0	0	0	0	1.0481	1	425264	0	1	0	0
0	0	1	0	0	1	1.04825	1	1680780	1	0	1	0
3	0	1	0	0	1	1.04866	1	1045977	0	0	1	0
0	0	1	0	0	1	1.04882	1	1605645	1	1	1	0
0	0	1	0	0	0	1.04887	1	20798392	1	1	0	0
0	1	0	0	0	0	1.04905	1	2141	0	1	1	0
0	0	1	0	0	1	1.04934	1	2116563	0	0	1	0
0	0	1	0	0	0	1.05061	1	2390869	1	1	1	0
0	0	1	0	0	1	1.05124	1	11432	1	1	1	0
0	0	1	0	0	1	1.05149	1	344089	1	0	1	0
0	1	0	0	0	0	1.05161	1	42287	0	1	0	0
0	0	1	0	0	1	1.05163	1	184236	1	1	1	0
6	0	1	0	0	0	1.05172	1	2698108	1	0	1	0
20	0	1	0	0	0	1.05184	1	15075383	1	1	1	0
0	0	1	0	0	0	1.05212	1	239285	1	1	1	0
1	0	1	0	0	1	1.05223	1	607644	1	1	0	0
0	0	1	0	0	0	1.05251	1	368145	1	0	1	0
1	0	1	0	0	0	1.05308	1	2358468	0	0	1	0
0	0	0	0	0	0	1.05318	0	840	0	1	0	0
0	1	0	0	0	1	1.05347	1	984859	1	0	1	0
0	1	0	0	0	0	1.05348	1	992513	0	1	1	0
0	0	1	0	0	1	1.05351	1	3964261	1	1	1	0
5	0	1	0	1	0	1.0536	1	2279003	1	0	1	0
0	0	0	0	0	0	1.05406	0	147	0	1	0	0
0	1	0	0	0	0	1.05422	1	6306	0	1	1	0
0	0	1	0	0	0	1.05461	1	4769	0	1	1	0
3	0	1	0	0	1	1.05464	1	17198371	1	0	1	0
0	0	1	0	0	1	1.05507	1	632410	0	0	0	0
0	0	1	0	0	1	1.05513	1	105593	1	0	1	0
0	1	0	0	0	0	1.05594	1	2972130	1	0	0	0
0	0	1	0	0	1	1.05659	1	72378106	1	0	1	0
0	0	1	0	0	1	1.05727	1	6393098	0	1	0	0
774	0	1	0	0	0	1.05769	1	119486545	1	0	0	0
0	0	1	0	0	0	1.05778	1	3237375	1	1	1	0
0	0	1	0	0	0	1.05785	1	4195468	0	1	0	0
0	0	0	1	0	0	1.05851	1	3182	1	0	1	0
0	0	1	0	0	0	1.05873	1	2345605	1	1	1	0
0	0	1	0	0	0	1.05905	1	232629	1	0	1	0
1	0	1	0	0	1	1.05921	1	2234200	1	0	1	0
1	0	1	0	0	1	1.05947	1	2194871	1	0	1	0
0	0	1	0	0	0	1.05949	1	2054887	1	0	1	0
0	0	1	0	0	0	1.05992	1	14704	1	0	0	1
8	1	0	0	0	1	1.06022	1	1726544	1	0	1	0
0	0	1	0	0	0	1.06071	1	10743051	1	0	1	0
0	0	1	0	0	0	1.06096	1	10304349	1	0	1	0
0	0	1	0	0	1	1.06112	1	1345872	1	1	1	0
0	0	1	0	0	0	1.06131	1	235456	1	0	1	0
1	0	1	0	0	0	1.06154	1	13220056	1	1	1	0
0	0	1	0	0	0	1.06209	1	2977774	1	0	1	0
0	0	1	0	0	0	1.06253	1	904637	1	0	0	0
0	0	1	0	0	0	1.06253	1	112365563	1	0	0	0
0	0	1	0	0	0	1.06282	1	3498516	1	0	1	0
0	0	1	0	0	0	1.06391	1	18935978	1	1	1	0
0	0	1	0	0	1	1.06402	1	598088	1	0	1	0
0	1	0	0	0	0	1.06403	1	133989	1	0	1	0
0	0	1	0	0	0	1.06438	1	36814	1	0	1	0
0	0	1	0	0	1	1.06515	1	356748	1	0	1	0
0	0	1	0	0	0	1.06638	1	2289560	1	0	1	0
0	0	1	0	0	0	1.0667	1	2493161	1	1	1	0
0	0	1	0	0	1	1.06683	1	2740657	1	1	1	0
4	0	1	0	0	0	1.06693	1	1344938	1	0	1	0
0	1	0	0	1	0	1.0676	1	146418	0	1	0	0
0	0	1	0	0	0	1.06816	1	2603071	1	0	0	0
0	0	1	0	0	0	1.06838	1	252428	1	0	1	0
0	0	1	0	0	0	1.06875	1	6412879	1	0	1	0
0	0	1	0	0	0	1.06916	1	9314544	1	0	1	0
0	0	1	0	0	1	1.06921	1	416155	1	1	1	0
0	0	1	0	0	0	1.0694	1	1094210	1	0	1	0
0	0	1	0	0	0	1.06984	1	122254	1	0	1	0
1	1	0	0	0	0	1.07253	1	730123	1	0	0	0
0	0	1	0	0	0	1.07306	1	3035759	0	0	1	0
0	1	0	0	0	0	1.07321	1	143063	0	0	1	0
0	0	1	0	0	0	1.07341	1	3954653	1	0	1	0
1	1	0	0	0	0	1.0736	1	368396	0	1	1	0
0	0	1	0	0	0	1.07382	1	784879	1	0	1	0
0	0	1	0	0	1	1.07388	1	501199	1	0	1	0
0	0	1	0	0	0	1.07394	1	905908	1	0	1	0
0	0	1	0	0	1	1.07462	1	37192734	1	1	1	0
0	0	1	0	0	1	1.07475	1	2602817	1	0	1	0
0	0	1	0	0	0	1.07546	1	6755679	1	0	1	0
0	1	0	0	1	0	1.07568	1	1376187	0	0	1	0
0	0	0	0	0	0	1.07748	0	20790	0	1	0	0
0	0	1	0	0	0	1.07841	1	49649690	1	0	1	0
0	0	1	0	0	0	1.07884	1	314881	1	0	1	0
0	0	1	0	0	0	1.07936	1	167618	0	0	0	0
0	0	1	0	0	0	1.07971	1	572983	0	0	1	0
0	0	1	0	0	1	1.07991	1	65497	1	0	0	0
0	0	1	0	0	0	1.08041	1	385608	1	0	1	0
0	0	0	1	0	1	1.08106	1	103044	1	0	0	1
0	0	1	0	0	1	1.08156	1	211770	1	0	0	0
0	0	1	0	0	1	1.08194	1	5784	1	0	0	0
4	0	1	0	0	0	1.08228	1	12478096	1	0	1	0
0	0	1	0	0	0	1.08299	1	214281	1	0	1	0
0	0	1	0	0	0	1.08319	1	9316076	1	0	1	0
0	0	1	0	0	0	1.08406	1	6667835	1	0	1	0
1	0	1	0	0	0	1.08412	1	9496154	1	1	1	0
0	0	1	0	0	0	1.08468	1	9500624	1	0	1	0
11	0	1	0	0	0	1.08598	1	2409014	1	0	1	0
0	0	1	0	0	0	1.08635	1	18217	1	0	1	0
0	0	0	0	0	0	1.08793	0	1128	0	1	0	0
0	0	1	0	0	0	1.08824	1	915519	0	0	0	1
0	1	0	0	0	1	1.0883	1	12656	1	1	1	0
0	0	1	0	0	0	1.08897	1	23491	0	0	0	1
0	0	1	0	0	1	1.09031	1	2698555	1	0	1	0
0	0	1	0	0	0	1.0911	1	2511902	1	0	1	0
0	0	1	0	0	0	1.09135	1	754103	1	0	1	0
0	0	1	0	0	1	1.09378	1	6528475	1	0	0	1
0	0	1	0	0	1	1.09378	1	658176	1	0	0	1
1	0	1	0	0	0	1.09536	1	2240896	0	1	0	0
0	0	0	1	0	0	1.09578	1	4679	1	1	0	0
0	1	0	0	0	1	1.09654	1	799471	1	0	1	0
0	0	1	0	0	0	1.09983	1	235654	1	0	1	0
0	1	0	0	0	1	1.09993	1	28111	1	0	1	0
0	0	1	0	0	1	1.10128	1	79254	1	1	0	0
0	0	1	0	0	1	1.10134	1	59323	1	0	1	0
0	0	0	1	0	0	1.10169	1	1323822	1	0	1	0
0	1	0	0	0	1	1.102	1	10084822	0	0	1	0
1	0	1	0	0	0	1.10203	1	2174993	1	0	1	0
0	0	1	0	0	0	1.10241	1	556785	1	0	1	0
0	0	0	1	0	1	1.10345	1	594989	1	0	0	1
0	1	0	0	0	0	1.10363	1	1874255	0	0	1	0
0	0	1	0	0	1	1.1042	1	786066	1	1	1	0
0	0	1	0	0	0	1.1053	1	82535	1	0	1	0
0	0	1	0	0	1	1.10562	1	245199	1	0	1	0
1	0	1	0	0	0	1.10866	1	2564623	1	0	1	0
0	0	0	1	0	1	1.10939	1	850	1	0	0	1
0	0	1	0	0	1	1.11008	1	246923	1	0	1	0
0	0	1	0	0	1	1.11038	1	2237533	1	0	0	1
0	0	1	0	0	0	1.11248	1	2224768	1	0	1	0
0	0	1	0	0	0	1.11253	1	4151013	1	0	1	0
0	0	1	0	0	0	1.11473	1	569065	1	0	1	0
0	0	1	0	0	0	1.11551	1	1735722	1	0	1	0
0	0	1	0	0	0	1.11612	1	12846959	1	1	1	0
1	0	1	0	0	0	1.11698	1	5475591	1	0	1	0
0	0	1	0	0	0	1.1174	1	1337555	1	0	1	0
0	1	0	0	0	0	1.1181	1	370970	0	1	0	0
1	0	1	0	0	0	1.11825	1	4045648	1	0	1	0
0	0	0	0	0	1	1.11865	0	1227	1	0	0	0
0	0	0	0	1	0	1.11896	0	295	0	1	1	0
0	0	0	1	0	0	1.11897	1	29342	1	0	1	0
0	0	1	0	0	0	1.12329	1	1536971	1	0	1	0
2	0	1	0	0	0	1.12503	1	28475392	0	0	1	0
0	1	0	0	0	0	1.12584	1	674068	0	1	0	0
0	1	0	0	0	1	1.12594	1	227825	1	1	0	0
0	0	1	0	0	1	1.12642	1	11272870	0	1	0	0
0	0	1	0	0	0	1.1276	1	458705	1	0	1	0
0	1	0	0	0	0	1.12954	1	812581	1	0	1	0
2	1	0	0	0	0	1.12998	1	3311088	0	0	1	0
1	0	1	0	0	0	1.13105	1	3442416	1	0	1	0
2	0	1	0	0	0	1.13112	1	4717465	1	0	1	0
0	1	0	0	1	0	1.13462	1	2094397	1	0	0	0
0	0	1	0	0	0	1.13507	1	259656	1	0	0	0
0	0	1	0	0	0	1.13706	1	6192744	1	0	1	0
0	0	0	0	0	1	1.13736	0	429	0	1	0	0
0	0	1	0	0	1	1.1392	1	7420043	1	0	1	0
0	0	1	0	0	0	1.14094	1	681432	1	0	1	0
0	0	1	0	0	1	1.14109	1	121631	0	0	1	0
0	0	0	0	0	0	1.1419	0	10281	0	0	0	0
0	0	1	0	0	1	1.14503	1	3005390	1	0	1	0
0	1	0	0	0	1	1.14703	1	1128062	1	0	1	0
2	0	1	0	0	1	1.14876	1	801878	1	0	1	0
0	1	0	0	0	0	1.15037	1	192821	1	0	1	0
0	1	0	0	1	0	1.15096	1	432307	1	0	1	0
0	0	1	0	0	0	1.15351	1	1648234	0	1	0	0
0	0	1	0	0	0	1.15537	1	3268283	0	0	1	0
0	0	1	0	0	0	1.15628	1	650611	0	1	1	0
0	0	0	1	0	0	1.15628	1	1832889	0	1	1	0
0	0	1	0	0	1	1.15704	1	2133832	0	0	1	0
1	0	1	0	0	0	1.15704	1	7327782	0	0	1	0
1	0	1	0	1	0	1.15706	1	14470946	1	1	1	0
0	0	1	0	0	0	1.1573	1	258894	0	0	1	0
0	0	1	0	1	0	1.15757	1	3439947	1	1	1	0
0	0	0	1	0	1	1.16141	1	1140031	1	0	1	0
0	0	1	0	0	0	1.16529	1	738297	0	1	0	0
0	0	1	0	0	0	1.16698	1	254556	0	1	0	0
0	0	1	0	0	0	1.16709	1	90324	0	1	0	0
0	1	0	0	0	0	1.16743	1	2705683	0	1	0	0
0	0	1	0	0	1	1.16975	1	1039925	1	0	1	0
0	0	1	0	0	0	1.17174	1	41266	0	1	0	0
0	0	0	0	0	0	1.17191	0	295	0	1	1	0
0	0	1	0	0	0	1.17313	1	189618	1	0	1	0
0	0	1	0	0	0	1.17372	1	109851	0	1	0	0
0	0	1	0	0	0	1.17392	1	1082548	0	1	1	0
0	0	1	0	0	0	1.17449	1	173210	0	1	0	0
0	0	1	0	0	1	1.17598	1	79254	1	1	0	0
0	0	1	0	0	1	1.17743	1	260219	1	0	1	0
0	0	1	0	0	0	1.17862	1	560116	0	1	1	0
0	0	1	0	0	0	1.17979	1	2137549	0	1	0	0
0	0	1	0	0	0	1.17998	1	19603	0	1	0	0
0	0	1	0	0	1	1.18223	1	211809	1	0	1	0
0	0	1	0	0	0	1.1873	1	306604	0	1	0	0
0	0	1	0	0	1	1.18753	1	2640061	1	0	1	0
63	0	1	0	0	0	1.18876	1	11004634	1	0	0	1
0	0	0	1	0	0	1.1899	1	398050	1	0	1	0
3	0	1	0	0	1	1.19101	1	9255746	1	1	0	0
0	1	0	0	0	1	1.19168	1	799471	0	0	1	0
0	0	1	0	0	0	1.1964	1	108473	0	1	0	0
0	0	1	0	0	0	1.19699	1	2902483	0	1	0	0
0	0	1	0	0	1	1.19865	1	21401546	1	1	1	0
0	0	1	0	0	0	1.19866	1	58362	0	1	0	0
0	0	1	0	0	0	1.19925	1	235778	0	1	0	0
0	1	0	0	0	1	1.19986	1	812581	1	1	1	0
0	0	1	0	0	0	1.20794	1	36835	0	1	0	0
0	0	1	0	0	1	1.2091	1	144188	1	0	1	0
0	0	1	0	0	0	1.2099	1	2326	0	1	0	0
0	0	1	0	1	0	1.21141	1	2122032	1	0	1	0
0	0	1	0	0	0	1.21228	1	94735	0	1	0	0
0	0	1	0	0	0	1.22007	1	8125485	1	0	1	0
0	0	1	0	0	0	1.22381	1	1754788	1	0	1	0
0	0	1	0	0	0	1.2272	1	10364889	0	0	1	0
0	1	0	0	0	0	1.22848	1	572888	0	0	0	0
0	0	1	0	0	0	1.23966	1	174023	1	0	1	0
1	0	1	0	0	0	1.24795	1	33981720	1	0	1	0
0	0	1	0	1	0	1.24896	1	3292982	0	1	1	0
0	0	1	0	0	0	1.24969	1	522978	0	1	0	0
0	0	1	0	0	1	1.25005	1	646856	1	0	0	1
0	0	1	0	0	0	1.25053	1	32581	1	0	1	0
0	0	1	0	0	0	1.25259	1	424297	1	0	1	0
0	1	0	0	0	0	1.25733	1	210773	0	1	1	0
0	0	1	0	1	0	1.26568	1	239285	1	0	1	0
0	1	0	0	0	0	1.26688	1	20983	0	0	1	0
0	1	0	0	0	1	1.27838	1	38613	1	0	1	0
4	0	1	0	0	1	1.28028	1	1125432	0	1	0	0
0	1	0	0	1	0	1.28703	1	300265	1	0	1	0
0	0	1	0	0	0	1.28738	1	367732	1	0	1	0
0	0	1	0	0	0	1.28907	1	713495	0	1	0	0
0	0	1	0	0	0	1.29972	1	140748	0	1	0	0
0	0	1	0	0	1	1.30118	1	43574848	1	1	1	0
0	0	1	0	0	1	1.31392	1	2307484	1	0	1	0
0	0	1	0	0	1	1.32598	1	1463002	1	0	1	0
2	0	1	0	0	1	1.36875	1	18935978	1	1	1	0
0	0	1	0	0	1	1.37156	1	9297909	0	0	1	0
0	0	0	0	1	0	1.39961	0	72	1	0	0	0
0	1	0	0	0	1	1.41468	1	208888	0	1	1	0
0	1	0	0	0	1	1.42958	1	799471	0	0	1	0
2	1	0	0	0	0	1.48572	1	582381	1	0	1	0
0	0	1	0	0	0	1.50321	1	205143	0	1	0	0
4	1	0	0	0	1	1.80668	1	1556881	1	1	1	0
2	1	0	0	0	0	1.84975	1	32647	1	0	0	1
0	0	1	0	0	0	1.87913	1	356700	0	0	1	0
0	1	0	0	0	0	1.92527	1	541527	0	0	1	0
10	0	0	1	0	1	1.98398	1	166574	1	0	1	0
12	0	1	0	1	0	2.05351	1	923095	0	0	0	12
0	0	1	0	0	0	2.05715	1	1057482	0	1	0	0
1	0	1	0	0	1	2.10338	1	8611771	1	0	0	1
0	0	1	0	0	1	2.11171	1	436381	1	0	0	1
0	1	0	0	0	1	2.11576	1	812596	1	0	0	1
2	0	1	0	0	1	2.16671	1	9255746	1	0	0	1
0	0	1	0	0	1	2.17032	1	37505	1	0	0	1
1	0	1	0	0	1	2.22819	1	1030274	1	0	1	0
0	0	1	0	0	1	2.23028	1	244488	1	1	1	0
10	0	1	0	0	1	2.23058	1	59779052	1	1	1	0
0	0	1	0	0	1	2.23115	1	328274	1	0	1	0
0	0	0	1	0	1	2.23164	1	9611	1	0	1	0
1	0	1	0	0	1	2.23545	1	6092117	1	1	1	0
0	0	1	0	0	1	2.23547	1	1299932	1	1	1	0
0	0	0	1	0	1	2.23822	1	513681	1	1	1	0
0	0	1	0	0	1	2.23979	1	2144974	1	1	1	0
0	0	1	0	0	1	2.24104	1	166608	1	1	1	0
1	0	1	0	0	1	2.24172	1	1436986	1	1	1	0
2	0	1	0	0	1	2.25005	1	2499613	1	0	0	1
1	0	1	0	0	1	2.25017	1	867384	0	0	0	1
0	0	0	1	0	1	2.25359	1	639542	0	0	0	1
1	0	1	0	0	1	2.2542	1	2462172	1	1	1	0
0	0	1	0	0	1	2.25875	1	3498516	1	1	1	0
0	0	1	0	0	1	2.29056	1	3809850	1	1	1	0
1	0	1	0	0	0	2.29171	1	169456	0	1	0	0
0	0	1	0	0	1	2.30559	1	2698555	1	0	0	1
4	0	1	0	0	1	2.39943	1	12866817	1	0	0	1
0	1	0	0	1	0	2.4001	1	208888	0	1	1	0
0	0	1	0	0	0	2.41775	1	6023650	1	0	0	1
0	0	1	0	0	0	2.44559	1	2074348	1	0	0	1
7	0	1	0	0	1	2.4792	1	40430400	1	0	0	1
1	0	1	0	0	1	2.48588	1	6412879	1	0	0	1
0	1	0	0	0	1	2.49505	1	93562	1	0	0	1
0	0	1	0	0	1	2.50069	1	113136	1	0	0	1
1	1	0	0	0	1	2.84094	1	3770508	1	0	0	1
0	0	1	0	0	0	2.85422	1	5742776	1	0	0	1
0	0	1	0	0	0	2.86454	1	1045977	1	0	0	1
0	0	1	0	0	0	2.88133	1	15144	1	0	0	1
0	0	0	0	0	1	3.07627	0	122	1	0	1	0
0	1	0	0	0	1	3.11956	1	437612	1	0	0	1
0	0	0	0	0	1	3.21486	0	137	0	1	0	0
0	1	0	0	1	0	3.22942	1	199910	0	1	0	0
0	0	0	0	0	1	3.47211	0	107	1	0	1	0
0	0	0	0	0	0	3.66756	0	119	0	0	0	0
